# Supplementary material for: A TLR4 Agonist Induces Osteosarcoma Regression by Inducing an Antitumor Immune Response and Reprogramming M2 Macrophages to M1 Macrophages
Source: MDPI journal article supplement (doi:10.3390/cancers15184635), 2023-09-19
Supplement: s1 [file s1]

**A**

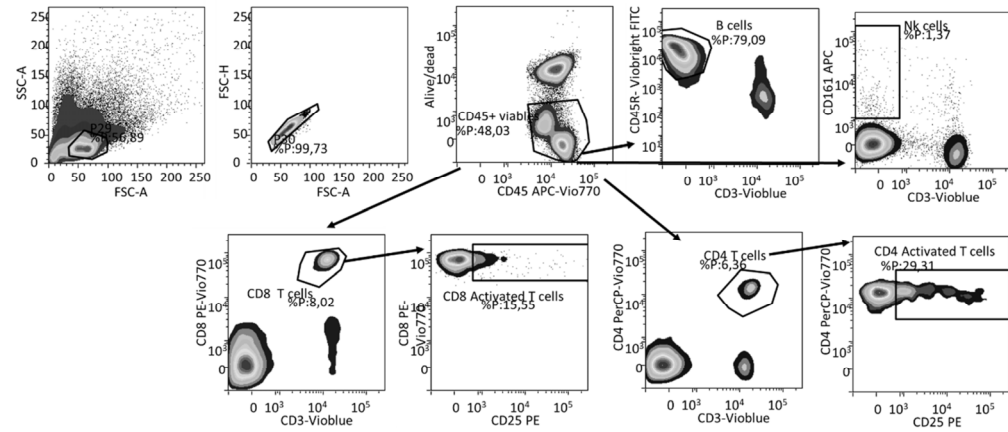

**B**

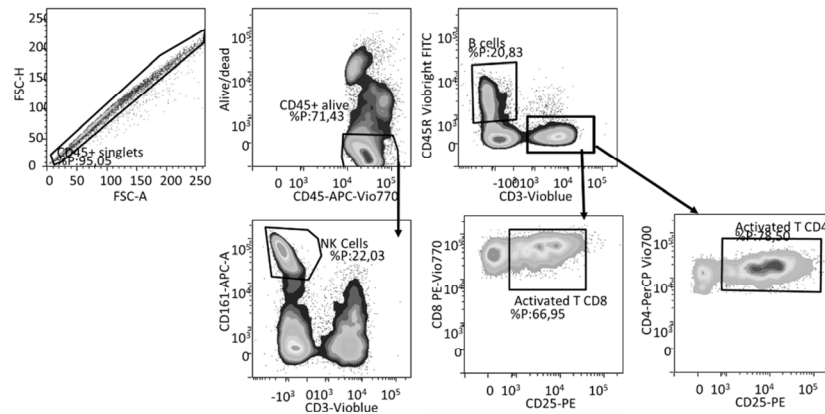

**C**

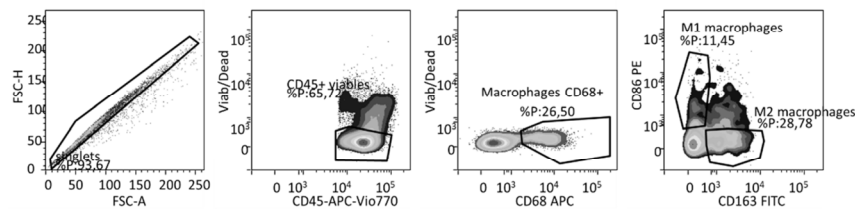

**Figure S1: Gating strategy used to phenotype the different immune populations by flow cytometry.** (A) Gating strategy used to identify, B cells, NK cells, CD4 Activated T cells, CD8 Activated T cells from the spleen. (B) Gating strategy used to identify, B cells, NK cells, CD4 Activated T cells, CD8 Activated T cells from tumors infiltrating immune cells. (C) Gating strategy used to identify total macrophages, M1 macrophages and M2 macrophages.

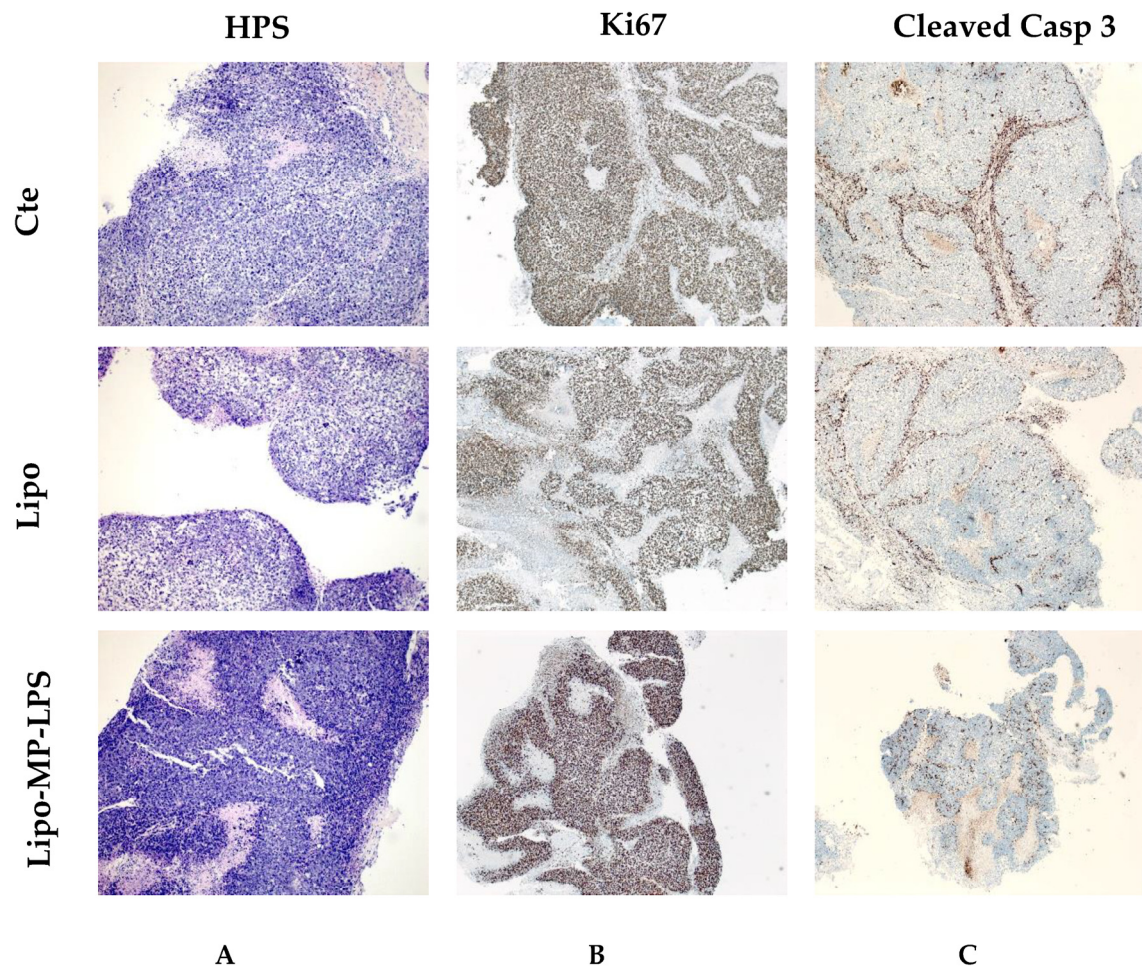

**Figure S2: Lipo-MP-LPS effect on organotypic model of OsA.** (A) HPS Staining of tumors. LipoMP-LPS did not modify the histological composition of tumors. (B) Immunostaining of Ki67. LipoMP-LPS treatment did not impact on the rate of proliferative Ki67+ tumor cells. (C) Immunostaining of cleaved caspase 3. LipoMP-LPS treatment did not increase the rate of cleaved caspase 3 cells indicating the absence of direct effect of LipoMP-LPS on OsA cells (Cte:273/FOV, Lipo:205/FOV, LipoMP-LPS:189/FOV).

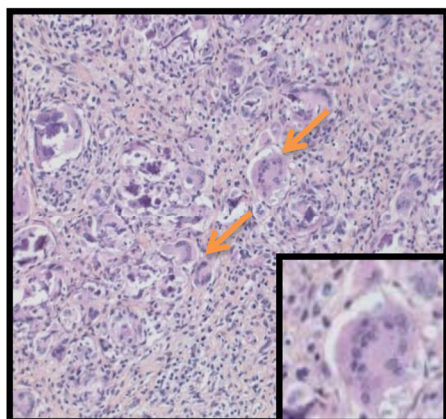

**Figure S3: Detection of multinucleated giant cells (MGC) in LipoMP-LPS treated tumors.** Multinucleated giant cells identified in HPS-stained slides (orange arrow). Location and morphology of these cells is concordant with osteoclasts. Magnification X20 and X40 (right bottom square).

**Table S1. Markers used for flow cytometry analyses.**

|           | Fluorochrome | Dilution | Supplier  |
|-----------|--------------|----------|-----------|
| CD3       | Vioblue      | 1/10     | Miltenyi  |
| Viability | Viogreen     | 1/100    | Miltenyi  |
| CD45R     | Viobright    | 1/10     | Miltenyi  |
|           | FITC         |          |           |
| CD25      | PE           | 1/50     | Biolegend |
| CD4       | PerCP-Vio700 | 1/10     | Miltenyi  |
| CD8       | PE-Vio770    | 1/10     | Miltenyi  |
| CD161     | APC          | 1/10     | Miltenyi  |
| CD45      | APC-Vio770   | 1/25     | Miltenyi  |
| CD163     | FITC         | 1/10     | Biorad    |
| CD86      | PE           | 1/10     | Miltenyi  |
| CD68      | APC          | 1/10     | Miltenyi  |
